# Supplementary material for: Social network analysis for the assessment of pig, cattle and buffalo movement in Xayabouli, Lao PDR
Source: PeerJ. 2019 Jan 9;6:e6177. doi: 10.7717/peerj.6177 (PMC6330034; doi:10.7717/peerj.6177)
Supplement: Supplemental Information 3 [file peerj-07-6177-s003.xlsx]

## Sheet: attributeSNA
no.	interviewee	age	gender	FMD
1	n001	49	1	0
2	n001	49	1	0
3	n019	55	1	0
4	n019	55	1	0
5	n022	40	1	0
6	n022	40	1	0
7	n028	33	1	0
8	n028	33	1	0
9	n035	33	1	0
10	n035	33	1	0
11	n046	50	1	0
12	n046	50	1	0
13	n052	41	1	0
14	n052	41	1	0
15	n055	50	1	0
16	n055	50	1	0
17	n062	40	1	0
18	n062	40	1	0
19	n067	50	1	0
20	n067	50	1	0
21	n072	21	1	0
22	n072	21	1	0
23	n079	28	1	0
24	n079	28	1	0
25	n084	45	1	0
26	n084	45	1	0
27	n090	25	2	0
28	n090	25	2	0
29	n093	28	1	0
30	n093	28	1	0
31	n098	38	1	0
32	n098	38	1	0
33	n111	36	1	0
34	n111	36	1	0
35	n118	63	1	0
36	n118	63	1	0
37	n127	21	2	0
38	n127	21	2	0
39	n132	35	2	0
40	n132	35	2	0
41	n138	50	1	0
42	n138	50	1	0
43	n141	41	2	0
44	n141	41	2	0
45	n146	45	1	0
46	n146	45	1	0
47	n150	40	1	0
48	n150	40	1	0
49	n153	46	1	0
50	n153	46	1	0
51	n156	54	1	0
52	n156	54	1	0
53	n160	41	1	0
54	n160	41	1	0
55	n162	47	2	0
56	n162	47	2	0
57	n166	29	2	0
58	n166	29	2	0
59	n172	49	2	0
60	n172	49	2	0
61	n174	35	1	0
62	n174	35	1	0
63	n177	54	2	0
64	n177	54	2	0
65	n182	46	2	0
66	n182	46	2	0
67	n190	30	1	0
68	n190	30	1	0
69	n199	53	1	0
70	n199	53	1	0
71	n202	46	1	0
72	n202	46	1	0
73	n207	64	1	0
74	n207	64	1	0
75	n215	21	2	0
76	n215	21	2	0
77	n222	43	2	0
78	n222	43	2	0
79	n225	20	2	0
80	n225	20	2	0
81	n228	30	2	0
82	n228	30	2	0
83	n233	32	1	0
84	n233	32	1	0
85	n237	29	1	0
86	n237	29	1	0
87	n242	48	2	0
88	n242	48	2	0
89	n247	53	2	0
90	n247	53	2	0
91	n251	42	2	0
92	n251	42	2	0
93	n256	33	2	0
94	n256	33	2	0
95	n259	50	2	0
96	n259	50	2	0
97	n264	22	2	0
98	n264	22	2	0
99	n269	30	2	0
100	n269	30	2	0
101	n272	30	2	0
102	n272	30	2	0
103	n279	60	1	0
104	n279	60	1	0
105	n285	41	1	0
106	n285	41	1	0
107	n301	30	1	0
108	n301	30	1	0
109	n308	50	2	0
110	n308	50	2	0
111	n311	33	1	0
112	n311	33	1	0
113	n316	43	1	0
114	n316	43	1	0
115	n321	35	1	0
116	n321	35	1	0
117	n310	50	1	0
118	n310	50	1	0
119	n330	47	1	0
120	n330	47	1	0
121	n287	40	1	0
122	n287	40	1	0
123	n340	33	1	0
124	n340	33	1	0
125	n351	53	1	0
126	n351	53	1	0
127	n315	35	1	0
128	n315	35	1	0
129	n358	47	1	0
130	n358	47	1	0
131	n360	55	1	1
132	n360	55	1	1
133	n362	33	2	0
134	n362	33	2	0
135	n364	50	1	1
136	n364	50	1	1
137	n367	32	1	0
138	n367	32	1	0
139	n372	45	1	0
140	n372	45	1	0
141	n380	43	1	0
142	n380	43	1	0
143	n383	45	2	0
144	n383	45	2	0
145	n387	39	1	0
146	n387	39	1	0
147	n391	40	1	0
148	n391	40	1	0
149	n394	41	2	0
150	n394	41	2	0
151	n395	42	1	0
152	n395	42	1	0
153	n401	30	1	0
154	n401	30	1	0
155	n403	32	1	0
156	n403	32	1	0
157	n406	35	1	0
158	n406	35	1	0
159	n407	45	1	0
160	n407	45	1	0
161	n410	48	1	0
162	n410	48	1	0
163	n412	55	1	0
164	n412	55	1	0
165	n414	50	1	0
166	n414	50	1	0
167	n416	54	1	1
168	n416	54	1	1
169	n418	48	1	1
170	n418	48	1	1
171	n422	68	1	1
172	n422	68	1	1
173	n428	50	1	1
174	n428	50	1	1
175	n433	60	1	1
176	n433	60	1	1
177	n436	57	1	0
178	n436	57	1	0
179	n438	39	1	0
180	n438	39	1	0
181	n441	62	1	0
182	n441	62	1	0
183	n450	51	1	0
184	n450	51	1	0
185	n454	63	1	0
186	n454	63	1	0
187	n461	38	2	0
188	n461	38	2	1
189	n465	53	1	0
190	n465	53	1	0
191	n463	29	1	0
192	n463	29	1	0
193	n468	49	2	0
194	n468	49	2	0
195	n493	41	1	1
196	n493	41	1	1
197	n458	34	1	0
198	n458	34	1	0
199	n617	63	1	0
200	n617	63	1	0
201	n621	62	1	0
202	n621	62	1	0
203	n624	53	1	1
204	n624	53	1	1
205	n626	56	1	0
206	n626	56	1	0
207	n629	54	1	1
208	n629	54	1	1
209	n633	67	1	1
210	n633	67	1	1
211	n637	42	2	1
212	n637	42	2	1
213	n640	51	2	1
214	n640	51	2	1
215	n642	57	1	1
216	n642	57	1	1
217	n647	50	2	1
218	n647	50	2	1
219	n654	58	1	0
220	n654	58	1	0
221	n657	54	1	0
222	n657	54	1	0
223	n660	40	1	0
224	n660	40	1	0
225	n666	49	1	0
226	n666	49	1	0
227	n500	70	1	0
228	n500	70	1	0
229	n507	58	2	0
230	n507	58	2	0
231	n509	41	1	0
232	n509	41	1	0
233	n519	73	1	0
234	n519	73	1	0
235	n524	52	1	1
236	n524	52	1	1
237	n532	41	1	0
238	n532	41	1	0
239	n538	54	1	0
240	n538	54	1	0
241	n544	48	1	0
242	n544	48	1	0
243	n537	48	1	0
244	n537	48	1	0
245	n545	41	1	0
246	n545	41	1	0
247	n566	58	1	0
248	n566	58	1	0
249	n569	47	1	0
250	n569	47	1	0
251	n574	44	1	0
252	n574	44	1	0
253	n539	49	1	0
254	n539	49	1	0
255	n587	47	1	0
256	n587	47	1	0
257	n593	51	1	0
258	n593	51	1	0
259	n520	51	1	1
260	n520	51	1	1
261	n534	47	1	0
262	n534	47	1	0
263	n673	43	1	1
264	n673	43	1	1
265	n683	72	1	1
266	n683	72	1	1
267	n678	54	1	0
268	n678	54	1	0
269	n702	63	1	0
270	n702	63	1	0
271	n704	53	1	1
272	n704	53	1	1
273	n708	51	2	0
274	n708	51	2	0
275	n713	41	2	0
276	n713	41	2	0
277	n716	34	2	1
278	n716	34	2	1
279	n680	30	2	0
280	n680	30	2	0
281	n722	73	1	0
282	n722	73	1	0
283	n725	48	1	0
284	n725	48	1	0
285	n679	40	2	0
286	n679	40	2	0
287	n732	50	2	1
288	n732	50	2	1
289	n737	30	2	0
290	n737	30	2	0
291	n735	51	1	1
292	n735	51	1	1
293	n740	53	1	0
294	n740	53	1	0
295	n743	46	2	0
296	n743	46	2	0
297	n752	43	2	0
298	n752	43	2	0
299	n756	49	2	0
300	n756	49	2	0
301	n762	28	2	0
302	n762	28	2	0
303	n764	57	1	0
304	n764	57	1	0
305	n773	49	2	0
306	n773	49	2	0
307	n777	61	1	0
308	n777	61	1	0
309	n779	54	1	1
310	n779	54	1	1
311	n742	42	2	0
312	n742	42	2	0
313	n787	50	2	0
314	n787	50	2	0
315	n790	56	2	0
316	n790	56	2	0
317	n792	42	2	0
318	n792	42	2	0
319	n795	52	1	0
320	n795	52	1	0
321	n789	42	2	0
322	n789	42	2	0
323	n799	35	2	0
324	n799	35	2	0
325	n800	55	2	0
326	n800	55	2	0
327	n803	67	1	0
328	n803	67	1	0
329	n805	65	1	0
330	n805	65	1	0
331	n807	57	1	1
332	n807	57	1	1
333	n809	32	2	0
334	n809	32	2	0
335	n815	32	2	0
336	n815	32	2	0
337	n819	38	1	0
338	n819	38	1	0
339	n823	38	2	0
340	n823	38	2	0
341	n833	51	1	0
342	n833	51	1	0
343	n842	35	1	0
344	n842	35	1	0
345	n837	33	1	0
346	n837	33	1	0
347	n850	48	1	0
348	n850	48	1	0
349	n829	42	1	0
350	n829	42	1	0
351	n855	34	2	0
352	n855	34	2	0
353	n858	48	1	1
354	n858	48	1	1
355	n866	41	1	1
356	n866	41	1	1
357	n868	47	1	1
358	n868	47	1	1
359	n871	43	2	0
360	n871	43	2	0
361	n835	51	1	0
362	n835	51	1	0
363	n836	34	1	0
364	n836	34	1	0
365	n124	54	1	0
366	n124	54	1	0
367	n886	49	1	0
368	n886	49	1	0
369	n889	49	1	1
370	n889	49	1	1
371	n891	48	1	1
372	n891	48	1	1
373	n895	67	1	0
374	n895	67	1	0
375	n900	65	1	0
376	n900	65	1	0
377	n904	62	1	0
378	n904	62	1	0
